# Supplementary material
Source: PubMed Central journal article supplement (PMC5764109)
Supplement: NIHMS925918-supplement.pdf [file NIHMS925918-supplement.pdf]

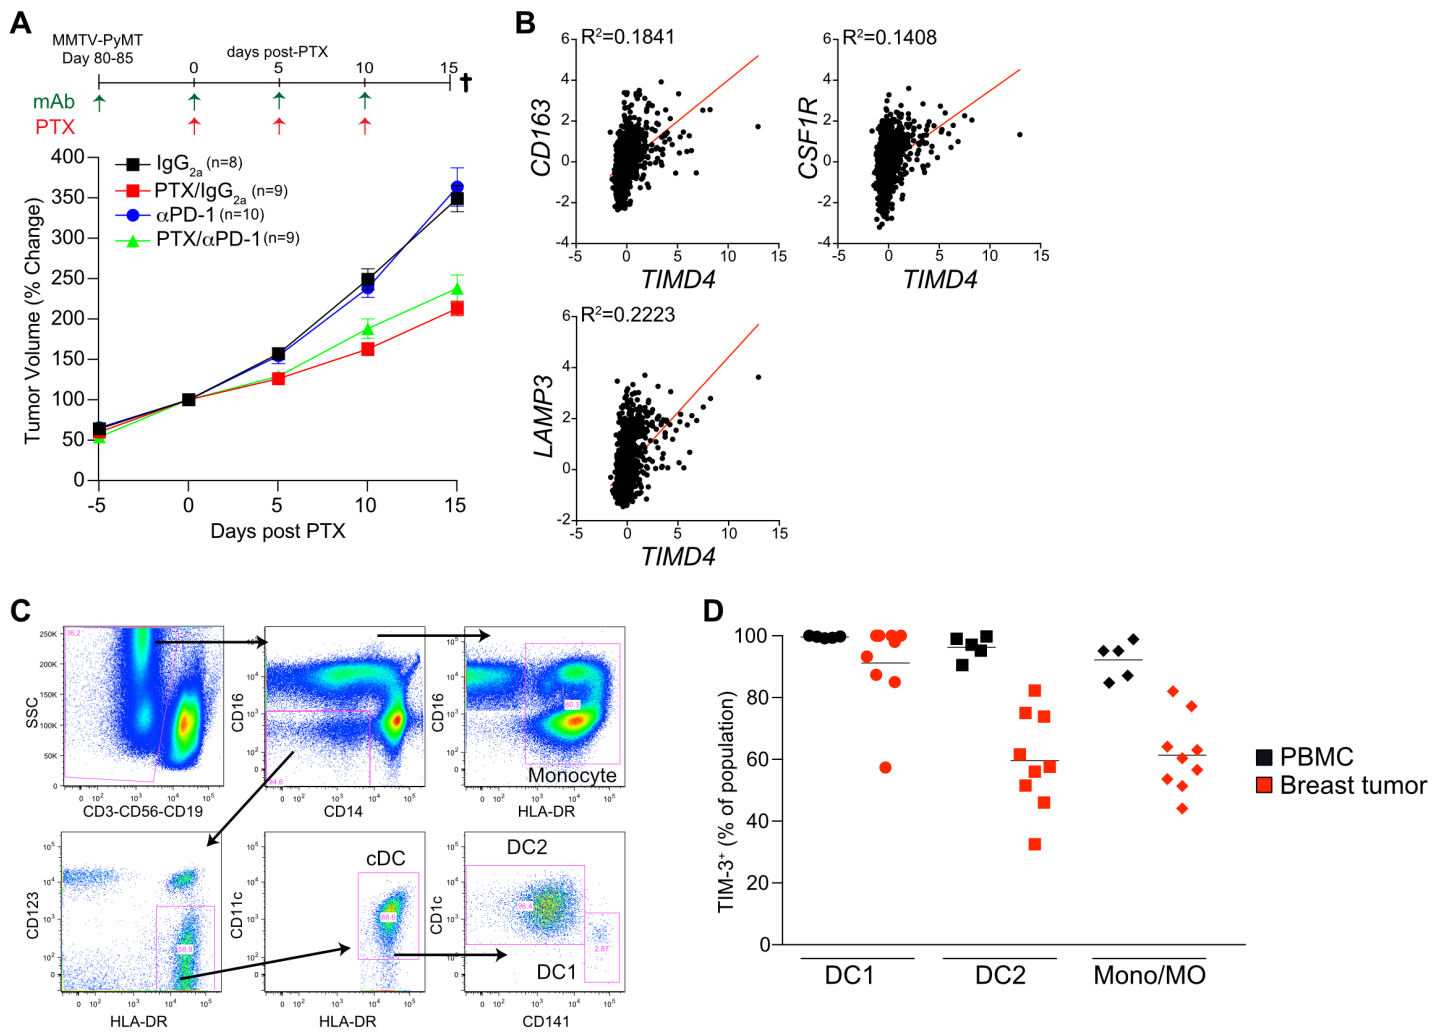

**Figure S1, related to Figure 1**

(A) Tumor volume shown as a relative change from the initiation of chemotherapy (day 0) in MMTV-PyMT animals. Mice were treated with an IgG<sub>2a</sub> isotype control or αPD-1, alone or together with 10 mg/kg PTX as indicated. n=8-10 mice per group, pooled over 4 cohorts. Data are mean ± SEM. (B) Correlation between *TIMD4* expression and myeloid genes (*CD163*, *CSF1R*, *LAMP3*) in human breast cancer samples from the TCGA dataset (n=1161, R<sup>2</sup> values by linear regression). (C) Gating strategy for human DCs shown in a peripheral blood sample. (D) Percentage of TIM-3<sup>+</sup> cells within the CD141<sup>+</sup> cDC1, CD11c<sup>+</sup> cDC2 or CD14<sup>+</sup> monocyte/macrophage populations in the peripheral blood of healthy volunteers (n=5) or breast tumors (n=9). Horizontal bars represent the mean.

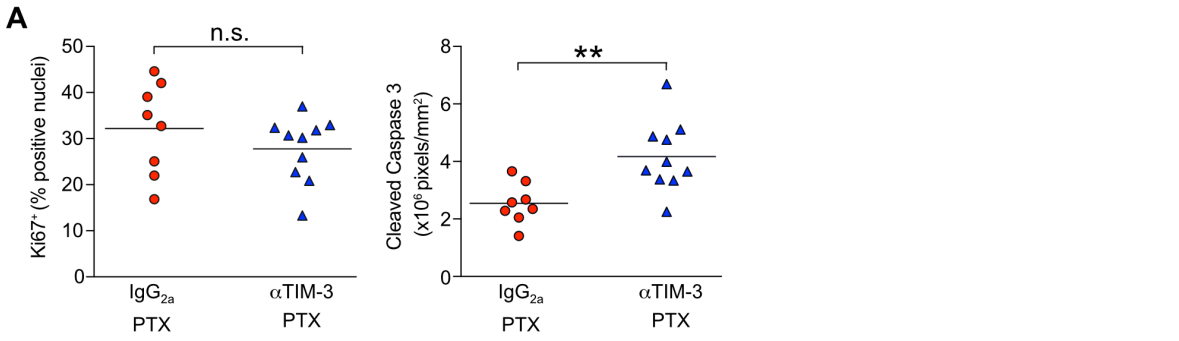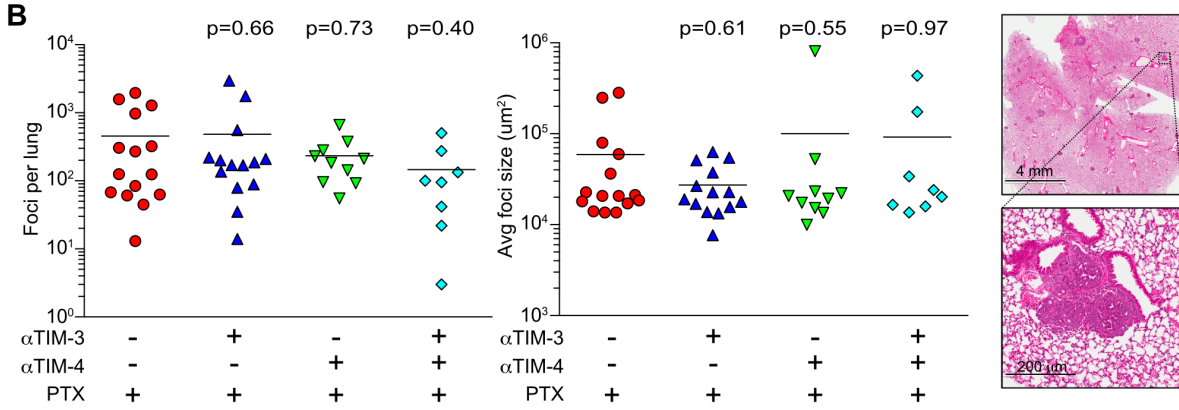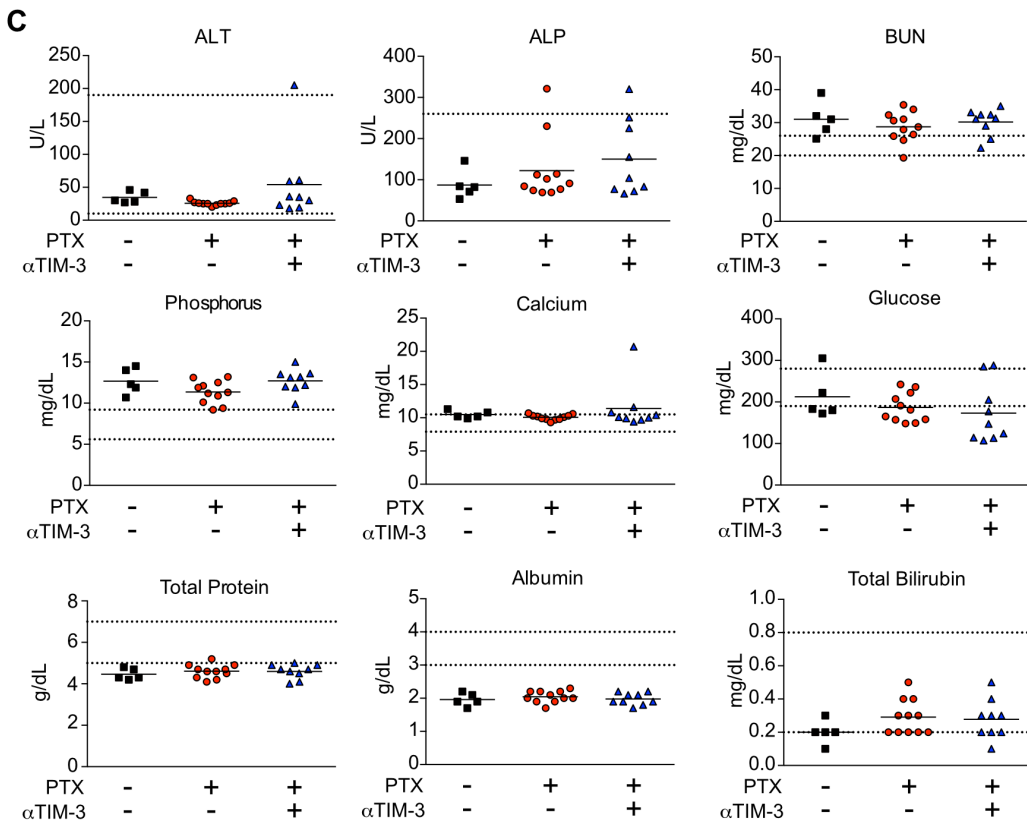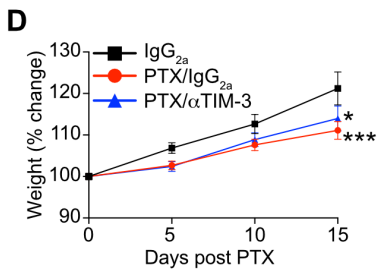

## Figure S2, related to Figure 2

(A) Automated analysis of Ki67 positive nuclei or cleaved caspase 3 immunohistochemistry staining in orthotopic PyMT tumors following treatment with IgG<sub>2a</sub>/PTX or  $\alpha$ TIM-3/PTX. n=8-10 per group, data pooled from 2 experiments. \*\*p<0.01, significance determined by an unpaired t-test. (B) The frequency and size of metastatic foci in the lungs of MMTV-PyMT animals treated with  $\alpha$ TIM-3,  $\alpha$ TIM-4, or PTX. Representative images are shown to the right. n=8-16, pooled over 8 cohorts. p value shown compared to PTX alone, with significance determined by Mann-Whitney. (C) Metabolic function tests reflecting serum isolated from mice treated with IgG<sub>2a</sub> alone, PTX/IgG<sub>2a</sub>, or PTX/ $\alpha$ TIM-3. Samples were taken by cardiac puncture at end-stage. Significance was determined by an unpaired t-test, with none found. The horizontal dotted lines indicate the expected range for healthy animals. ALT, alanine transaminase; ALP, alkaline phosphatase; BUN, blood urea nitrogen. (D) Weight of mice treated with IgG<sub>2a</sub> alone, PTX/IgG<sub>2a</sub>, or PTX/ $\alpha$ TIM3. n=10 per group, pooled over 8 cohorts. Data are shown as the mean  $\pm$  SEM; \*p<0.05, \*\*\*p<0.001, with significance determined by 2-way ANOVA compared to IgG<sub>2a</sub> control. Horizontal bars in A-C represent the mean.

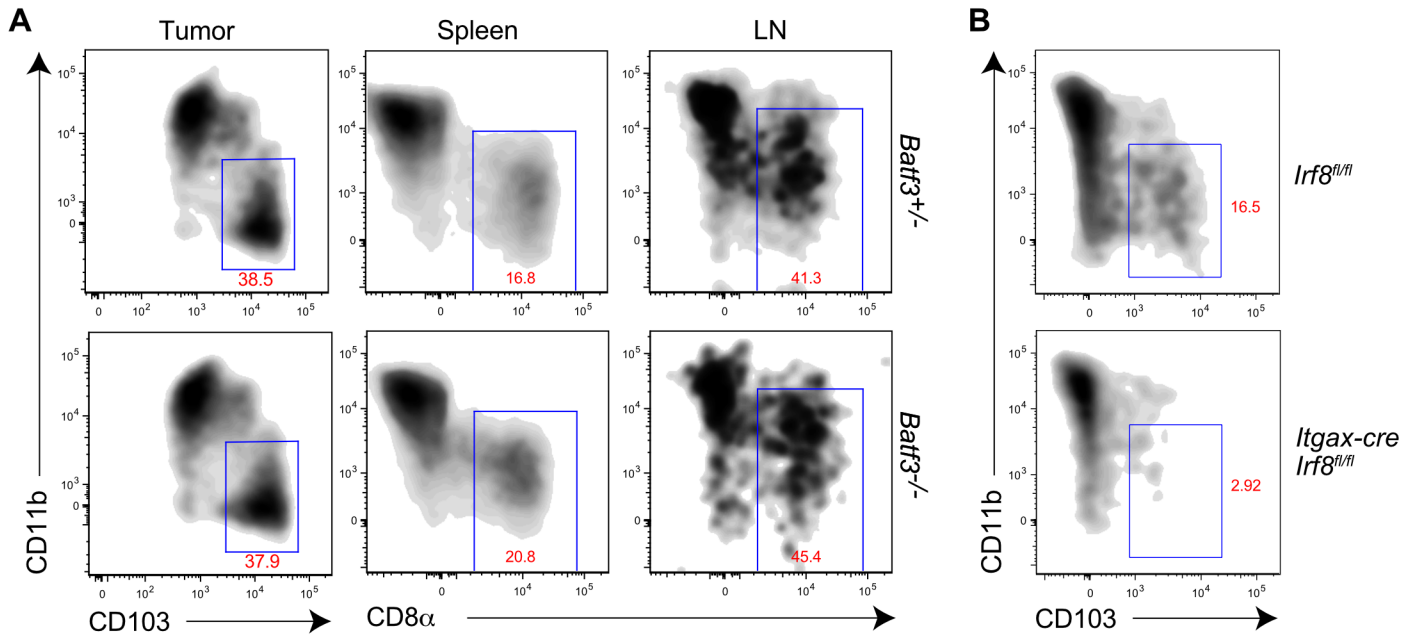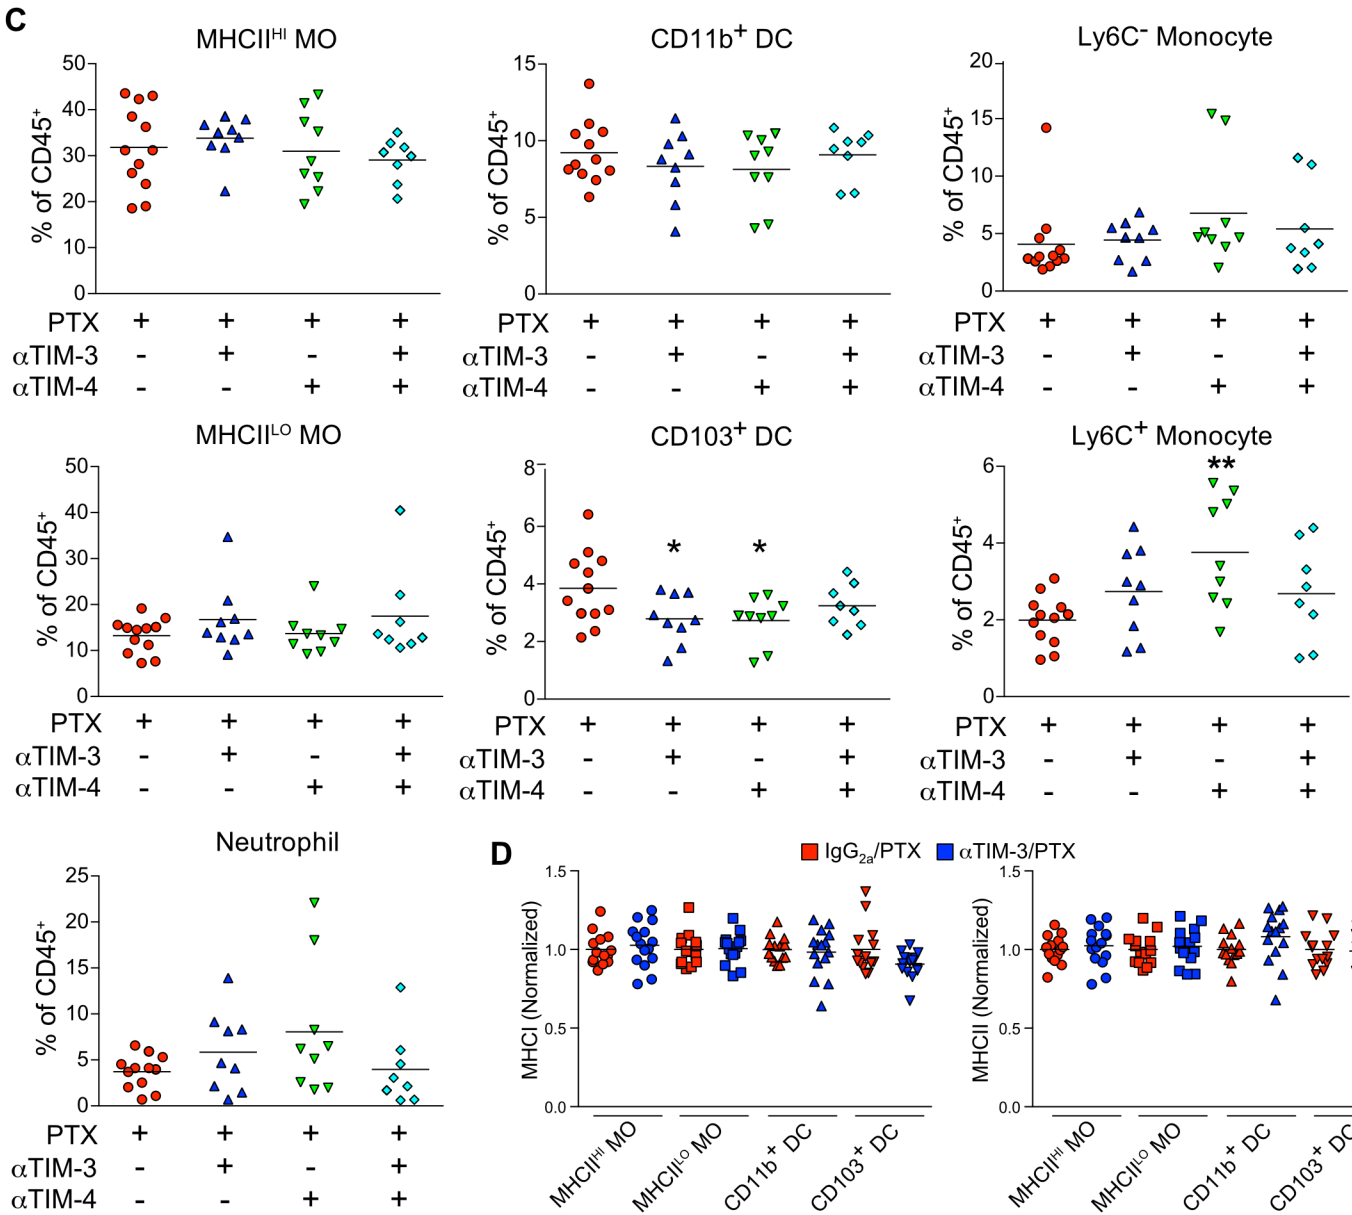

### Figure S3, related to Figure 3

(A) cDC subsets (gated on  $CD45^+CD11c^+MHCII^+F4/80^-$ ) within MMTV-PyMT tumors from animals either proficient (+/-) or deficient (-/-) in *Batf3*, or from the spleen or lymph nodes (LN) of wild type FVBN/J animals either proficient or deficient in *Batf3*. One of two representative experiments shown. (B) cDC subsets (gated on  $CD45^+CD11c^+MHCII^+F4/80^-$ ) within PyMT tumors implanted into chimeric C57BL/6J animals reconstituted with either *Itgax-cre;Irf8<sup>fl/fl</sup>* or *Irf8<sup>fl/fl</sup>* bone marrow. (C) Frequency of myeloid subsets as a percentage of total  $CD45^+$  cells within MMTV-PyMT tumors of mice treated for 15 days with PTX and a combination of  $\alpha$ TIM-3 and/or  $\alpha$ TIM-4 antibodies. n=8-12 per group, data pooled over 7 cohorts. \*p<0.05, \*\*p<0.01, with significance determined by unpaired t-test with Welch's correction compared to PTX alone group. (D) Surface expression of MHCI and MHCII on macrophages and cDCs from MMTV-PyMT animals treated with PTX for 7 days in conjunction with either IgG<sub>2a</sub> or  $\alpha$ TIM-3. n=13-15 per group with data pooled over 3 experiments by normalizing to 1. Horizontal bars in C, D represent the mean.

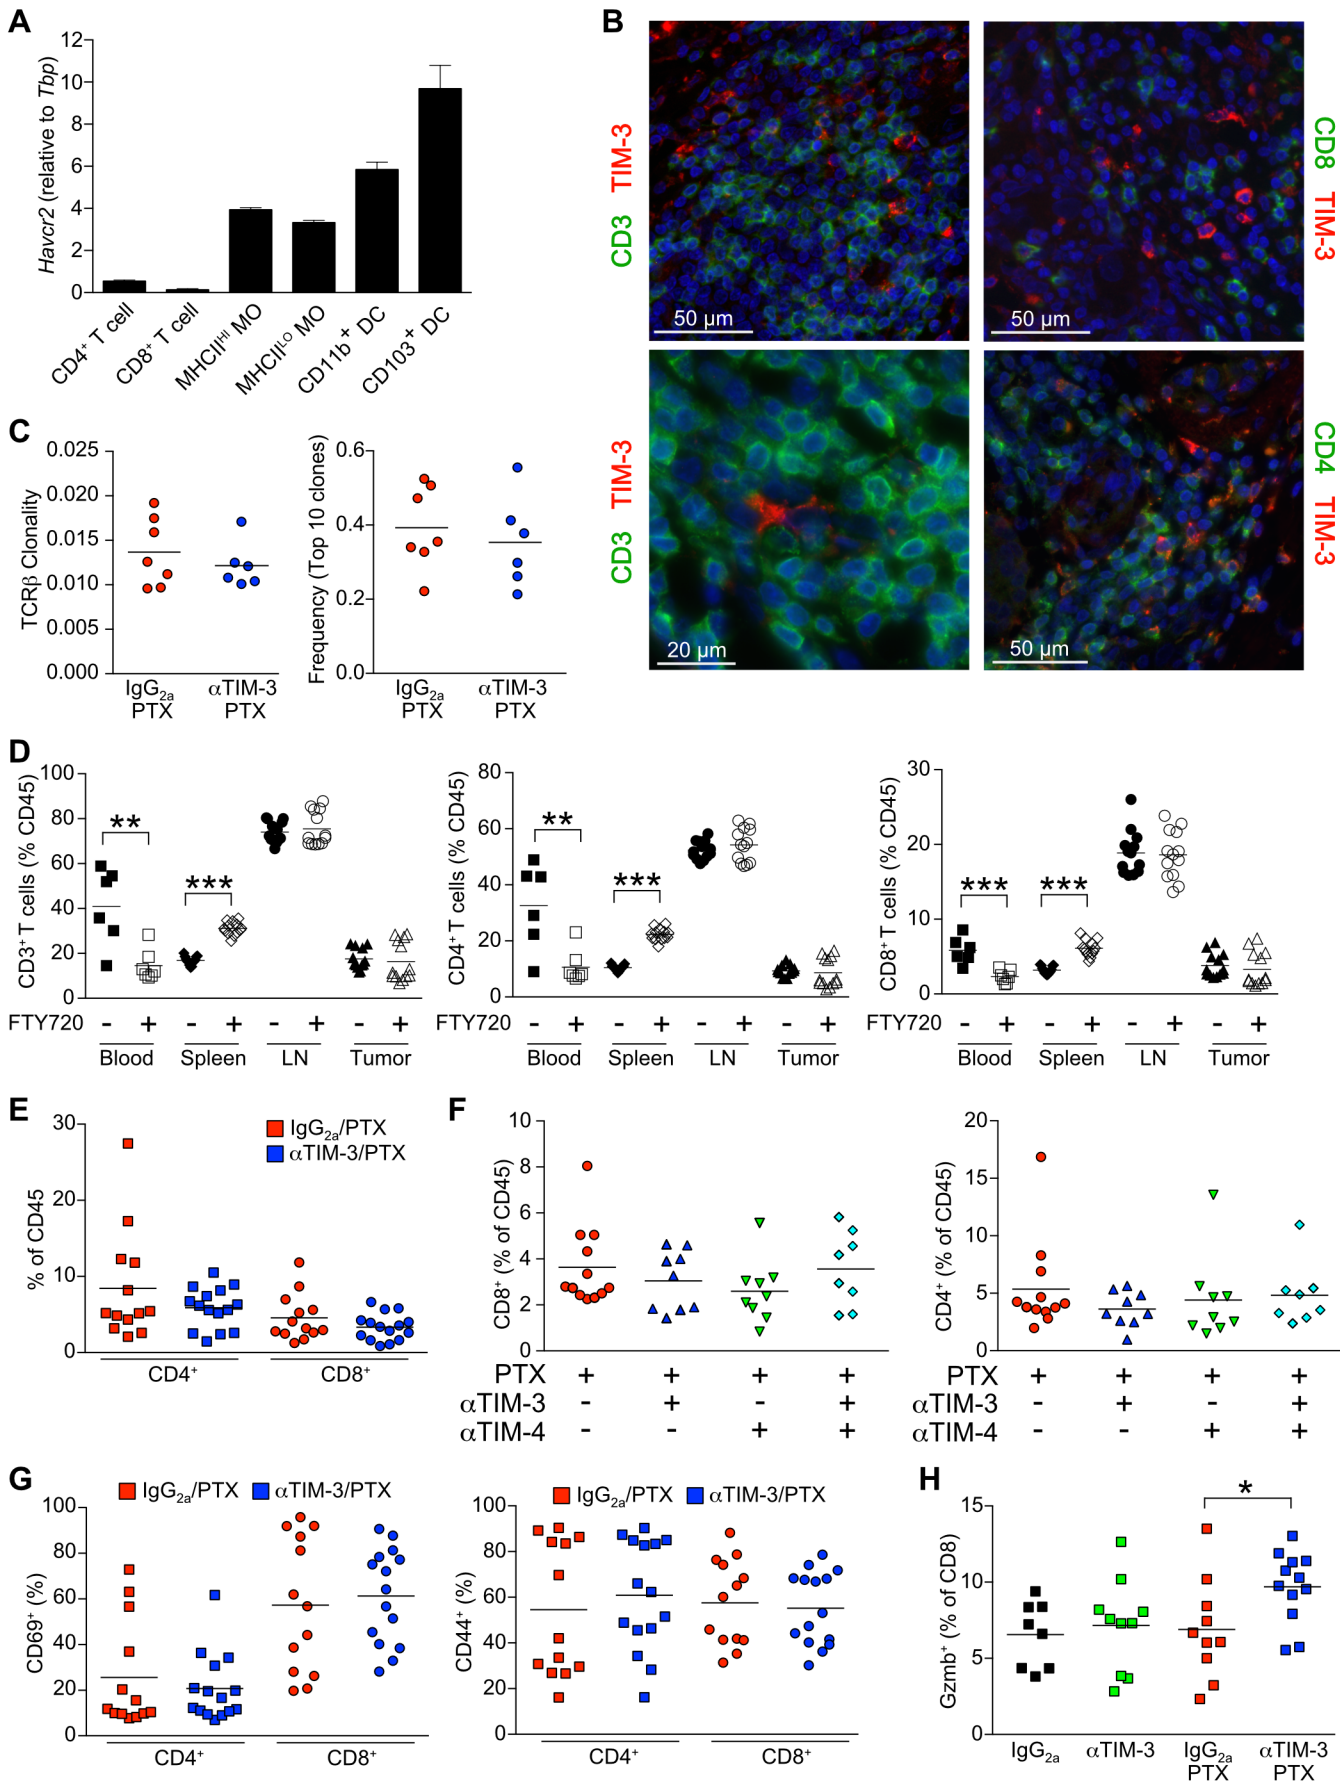

#### Figure S4, related to Figure 4

(A) *Havcr2* mRNA expression levels in leukocyte populations isolated from MMTV-PyMT mice treated with PTX, as determined by real time PCR. Data are normalized to *Tbp* expression and displayed as mean  $\pm$  SEM with n=6-8 per cell type. (B) Immunofluorescent staining for TIM-3 (red) and CD3, CD4 or CD8 (green) in human breast cancer. DNA was visualized with Hoechst 33342 (blue). 3 patient samples were analyzed for each combination. (C) Clonality of T cell receptor  $\beta$  (TCR $\beta$ ) in the peripheral blood of MMTV-PyMT mice treated with  $\alpha$ TIM-3 and PTX (day 15), as determined by immunoSEQ. n=6-7 per group, data pooled over 2 cohorts. (D) Percentage of CD3<sup>+</sup>, CD3<sup>+</sup>CD4<sup>+</sup> or CD3<sup>+</sup>CD8<sup>+</sup> T cells within the lymph nodes (LN), spleens, and tumors of animals bearing implanted tumors treated with DMSO or FTY720 for 7 days. Data merged from 3 experiments. (E) Frequency of CD8<sup>+</sup> and CD4<sup>+</sup> T cells within MMTV-PyMT tumors as a percent of total CD45<sup>+</sup> cells 2 days following the 2nd dose of PTX (day 7). n=13-15 mice per group pooled over 3 cohorts. (F) Frequency of CD8<sup>+</sup> and CD4<sup>+</sup> T cells within MMTV-PyMT tumors as a percent of total CD45<sup>+</sup> cells (day 15). n=8-12 per group, data pooled over 7 cohorts (G) Percent of T cells expressing CD69 (left) or CD44 (right) within MMTV-PyMT tumors, 2 days post PTX (day 7). n=13-15 mice per group pooled over 3 cohorts. (H) CD8<sup>+</sup>Gzmb<sup>+</sup> T cells shown as percentage of total CD8<sup>+</sup> T cells. Data are from mice bearing PyMT implantable tumors treated with IgG<sub>2a</sub> isotype control,  $\alpha$ TIM-3, or PTX. Tumors were analyzed 2 days post PTX (day 7). n=8-12 per group, data pooled from 2 experiments. Horizontal bars in C-H represent the mean; \*p<0.05, \*\*p<0.01, \*\*\*p<0.001 by an unpaired t-test.

**A**

| MHCII <sup>HI</sup> MOs |        |         | MHCII <sup>LO</sup> MOs |        |         |
|-------------------------|--------|---------|-------------------------|--------|---------|
| Gene                    | Fold   | p value | Gene                    | Fold   | p value |
| <i>Ccl7</i>             | 1.7976 | 0.0015  | <i>Cd3eap</i>           | 2.5285 | 0.0425  |
| <i>Hcst</i>             | 1.7330 | 0.0481  | <i>Gata3</i>            | 2.2161 | 0.0025  |
| <i>Irf7</i>             | 0.6562 | 0.0069  | <i>Ltf</i>              | 2.2066 | 0.0087  |
| <i>Tlr5</i>             | 0.6477 | 0.0102  | <i>Zbtb7b</i>           | 2.0216 | 0.0496  |
| <i>Cxcl1</i>            | 0.6376 | 0.0045  | <i>Bcl2</i>             | 1.9110 | 0.0079  |
| <i>Cd34</i>             | 0.6036 | 0.0366  | <i>Rorc</i>             | 1.8199 | 0.0012  |
| <i>Ifitm1</i>           | 0.5872 | 0.0106  | <i>Smad5</i>            | 1.7975 | 0.0076  |
| <i>Il1r2</i>            | 0.3914 | 0.0010  | <i>Casp2</i>            | 1.7947 | 0.0148  |
|                         |        |         | <i>Ptk2</i>             | 1.7739 | 0.0471  |
|                         |        |         | <i>Abcb10</i>           | 1.7576 | 0.0047  |
| CD11b <sup>+</sup> DCs  |        |         | CD103 <sup>+</sup> DCs  |        |         |
| Gene                    | Fold   | p value | Gene                    | Fold   | p value |
| <i>Traf2</i>            | 2.6839 | 0.0022  | <i>Il15ra</i>           | 1.7369 | 0.0257  |
| <i>Cxcl9</i>            | 2.5956 | 0.0141  | <i>S100a8</i>           | 1.7351 | 0.0302  |
| <i>Cd22</i>             | 2.5538 | 0.0029  | <i>Muc1</i>             | 1.6901 | 0.0346  |
| <i>Cxcl11</i>           | 1.9942 | 0.0237  | <i>Cd24a</i>            | 1.6558 | 0.0047  |
| <i>Cx3cr1</i>           | 1.8214 | 0.0071  | <i>C3</i>               | 1.6094 | 0.0000  |
| <i>Pdgfb</i>            | 1.8168 | 0.0008  | <i>Rela</i>             | 1.6025 | 0.0441  |
| <i>Fcgr4</i>            | 1.7617 | 0.0355  | <i>Il6st</i>            | 1.5794 | 0.0066  |
| <i>Cxcl10</i>           | 1.6686 | 0.0311  | <i>Psmc7</i>            | 1.5782 | 0.0405  |
| <i>Ccl3</i>             | 1.6685 | 0.0305  | <i>Stat5a</i>           | 1.5377 | 0.0112  |
| <i>Vcam1</i>            | 1.6580 | 0.0356  | <i>Pdcd2</i>            | 1.5259 | 0.0193  |
| <i>Tnfrsf13b</i>        | 1.6482 | 0.0425  | <i>Ccl12</i>            | 0.6253 | 0.0435  |
| <i>Tlr1</i>             | 1.6399 | 0.0371  | <i>Ifngr2</i>           | 0.6061 | 0.0143  |
| <i>Cd69</i>             | 1.6384 | 0.0144  | <i>Cxcl1</i>            | 0.6008 | 0.0393  |
| <i>Tgfb1</i>            | 1.5793 | 0.0087  | <i>Clec4e</i>           | 0.5897 | 0.0451  |
| <i>Cmklr1</i>           | 1.5758 | 0.0142  | <i>Msr1</i>             | 0.5672 | 0.0453  |
| <i>Irf8</i>             | 1.5616 | 0.0120  | <i>Ifit2</i>            | 0.5576 | 0.0155  |
| <i>Trem2</i>            | 1.5530 | 0.0474  | <i>Crlf2</i>            | 0.5559 | 0.0281  |
| <i>Tnfrsf14</i>         | 1.5506 | 0.0430  | <i>Fcgr2b</i>           | 0.4848 | 0.0386  |
| <i>Ccl12</i>            | 1.5366 | 0.0186  | <i>Trem1</i>            | 0.4236 | 0.0350  |
| <i>Clqa</i>             | 1.5204 | 0.0300  | <i>Ifitm1</i>           | 0.4209 | 0.0078  |
| <i>Cd40</i>             | 1.5066 | 0.0051  |                         |        |         |
|                         |        |         | CD103 <sup>+</sup> DCs  |        |         |
| Gene                    | Fold   | p value | Gene                    | Fold   | p value |
| <i>Tlr5</i>             | 0.6409 | 0.0344  | <i>Cxcl11</i>           | 2.5306 | 0.0037  |
| <i>Fkbp5</i>            | 0.6153 | 0.0040  | <i>Cxcl10</i>           | 1.9417 | 0.0201  |
|                         |        |         | <i>Cxcl9</i>            | 1.6854 | 0.0440  |
|                         |        |         | <i>Tagap</i>            | 1.5823 | 0.0181  |
|                         |        |         | <i>Cd40</i>             | 1.5252 | 0.0243  |

**B**
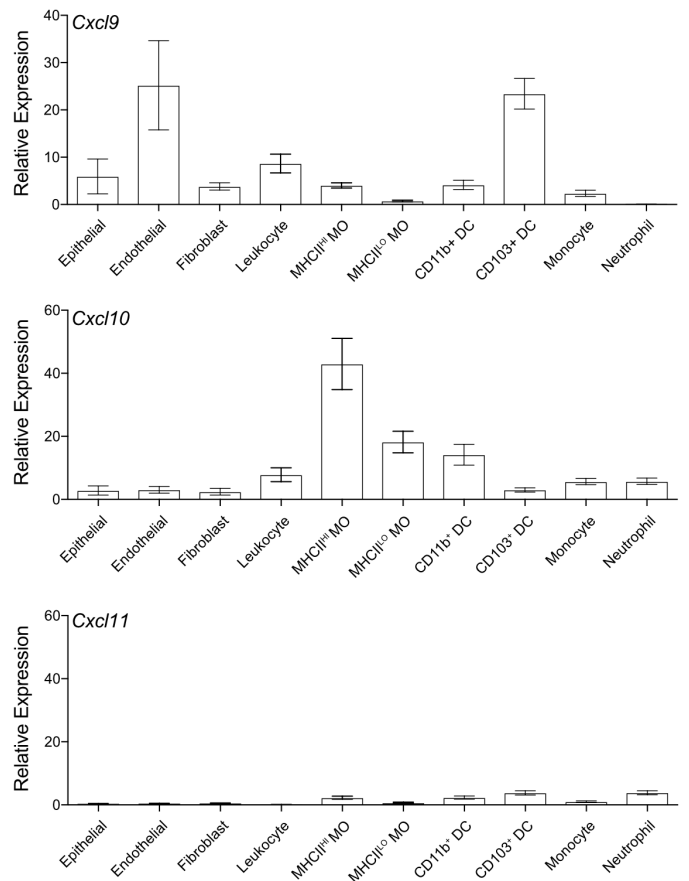
**C**
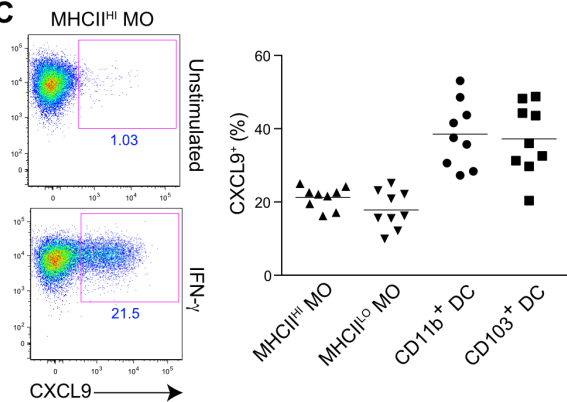
**D**
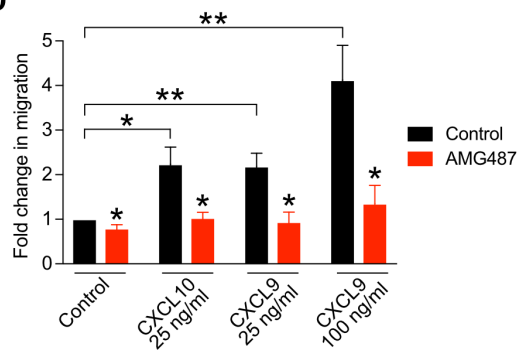



**Figure S5, related to Figure 5**

(A) Fold change in mRNA expression levels in tumor macrophages and cDCs isolated from mice bearing orthotopically implanted PyMT tumors 2 days following second dose of PTX (day 7). Expression was determined by NanoString. Significance was determined by an unpaired t-test, with data pooled from 2 experiments. (B) mRNA expression of *Cxcl9*, *Cxcl10*, or *Cxcl11* by epithelial and stromal cells in untreated MMTV-PyMT tumors. Data are normalized to *Tbp* expression and displayed as mean  $\pm$  SEM with n=8 per cell type. (C) Percentage of MMTV-PyMT tumor macrophages and cDCs expressing CXCL9 following ex vivo stimulation with 40 ng/ml IFN- $\gamma$  for 4 hr in the presence of brefeldin A. Representative intracellular staining is shown to the left. Horizontal bars represent the mean (n=9), with data pooled from two experiments. (D) Transwell migration of activated CD8<sup>+</sup> splenic T cells in response to recombinant murine CXCL9 or CXCL10, either in the presence or absence of 100 nM of the CXCR3 inhibitor ( $\pm$ )-AMG 487. Normalized data are displayed as mean  $\pm$  SEM of biological replicates compiled from three independent experiments. Significance was determined by an unpaired t-test, with \*p<0.05, \*\*p<0.01.

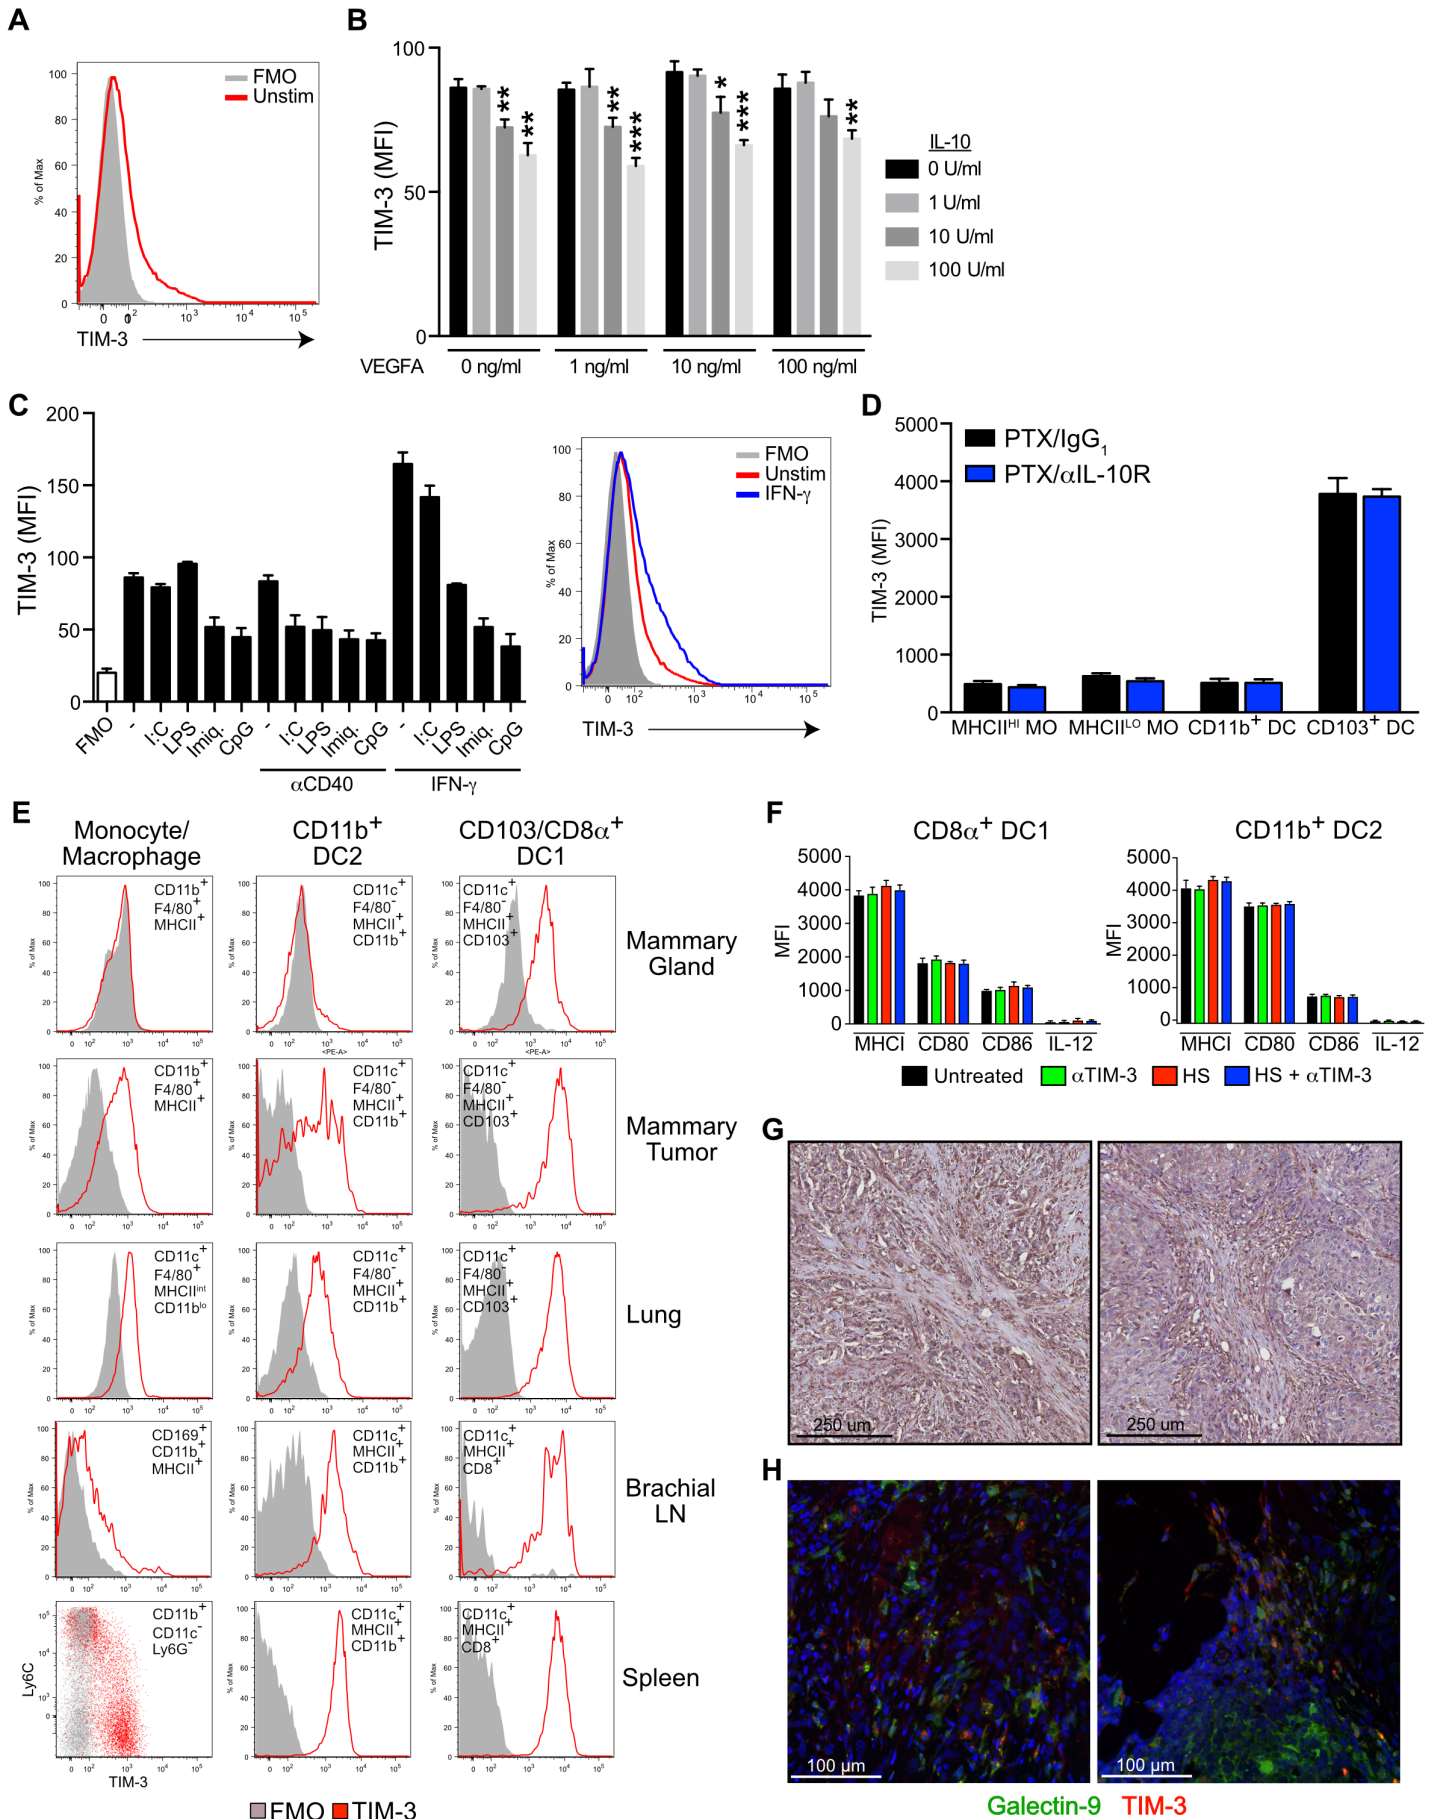

### Figure S6, related to Figure 6

(A-C) Surface expression of TIM-3 on FLT-3L-induced BMDCs as measured by flow cytometry, either unstimulated or stimulated with the indicated conditions for 24 hr. (A) Histogram displaying TIM-3 surface expression relative to fluorescence minus one (FMO) control. (B) TIM-3 surface mean fluorescence intensity (MFI) following incubation with IL-10 or VEGFA. (C) TIM-3 surface MFI following stimulation with Poly(I:C), LPS, Imiquimod, CpG,  $\alpha$ CD40, or IFN- $\gamma$ . A representative histogram is shown on the right. Data for B-C are displayed as mean  $\pm$  SD of technical replicates; \* $p$ <0.05, \*\* $p$ <0.01, \*\*\* $p$ <0.001, significance determined by an unpaired t-test. One of two representative experiments is shown. (D) TIM-3 surface MFI on macrophage and cDC subsets from tumors of MMTV-PyMT mice treated with PTX and either IgG<sub>1</sub> isotype control or  $\alpha$ IL-10R antibody.  $n=7$  per group, data shown as mean  $\pm$  SEM. (E) Surface expression of TIM-3 in monocytes, macrophages, CD11b<sup>+</sup> cDCs, and CD103<sup>+</sup>/CD8<sup>+</sup> cDCs in the mammary gland, lung, spleen and lymph nodes (LNs) of non-tumor bearing animals.  $n=4$ , one of two representative experiments shown. (F) Expression of activation markers by splenic cDCs following incubation with  $\alpha$ TIM-3 and/or tumor cell debris generated by heat shock (HS). One of two representative experiments is shown, with data displayed as mean  $\pm$  SD of 4 technical replicates. (G) Representative galectin-9 immunohistochemistry in human breast cancer samples ( $n=5$ ). (H) Representative immunofluorescent staining for TIM-3 (red) and galectin-9 (green) in human breast cancer. DNA was visualized with Hoechst 33342 (blue). 3 patient samples were analyzed for each combination.

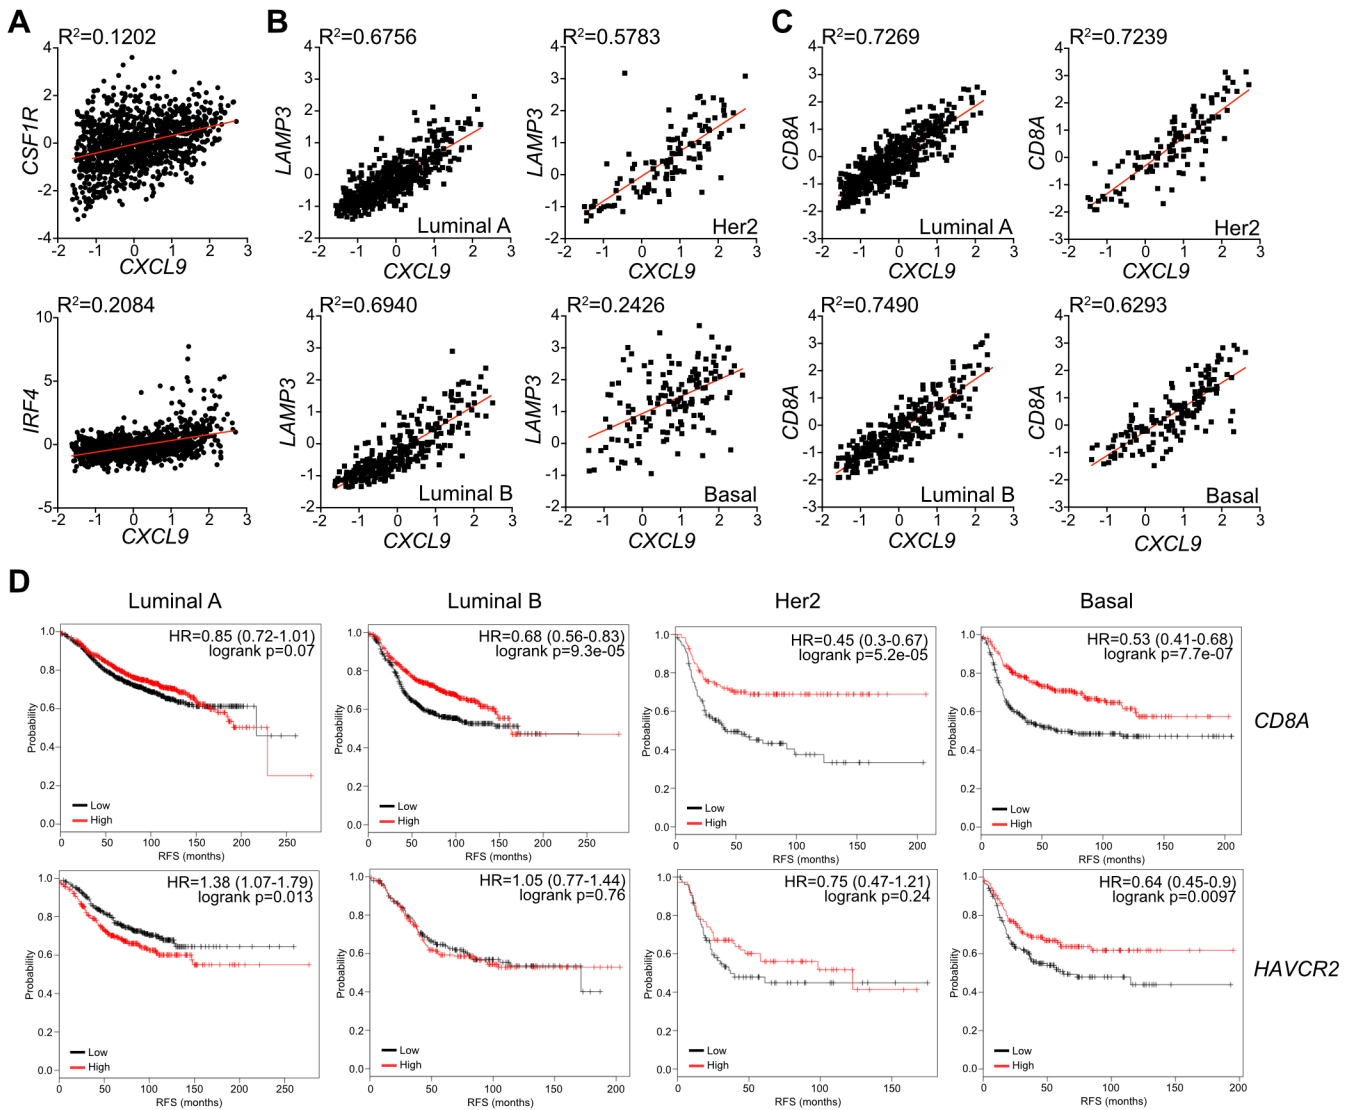

**Figure S7, related to Figure 7**

(A) Linear regression analysis between *CXCL9* expression and *CSF1R* or *IRF4* in human breast cancer samples from the TCGA dataset (n=1161). (B-C) Linear regression analysis between *CXCL9* expression and (B) *LAMP3* or (C) *CD8A* in samples from intrinsic luminal A (n=513), luminal B (n=286), Her2 (n=112) and basal (n=145) molecular subtypes. (D) Recurrence free survival (RFS) based upon median expression of *CD8A* or *HAVCR2* in breast tumor tissue. Data are shown for intrinsic luminal A, luminal B, Her2 and basal molecular subtypes (n=1933, 1149, 251, 618 for *CD8A*; n=841, 407, 156, 360 for *HAVCR2*). Hazard ratio (HR) and logrank p values are shown in the upper right of each Kaplan-Meier Plot.
